# Supplementary material for: Assessing a thermal spike model of swift heavy ion–matter interactions via Pd1−xNix/Si interface mixing
Source: Royal Society of Chemistry journal article supplement (doi:10.1039/c9cp02052g), 2019-01-01
Supplement: c9cp02052g1.pdf [file c9cp02052g1.pdf]

Electronic Supplementary Information

## **Assessing thermal spike model of swift heavy ion-matter interaction via Pd<sub>1-x</sub>Ni<sub>x</sub>/Si interface mixing**

Paramita Patra<sup>a</sup>, S. A. Khan<sup>b</sup>, M. Bala<sup>c</sup>, D. K. Avasthi<sup>d</sup>, S. K. Srivastava<sup>a</sup>

<sup>a</sup>Department of Physics, Indian Institute of Technology Kharagpur, Kharagpur 721302, India

<sup>b</sup>Inter-University Accelerator Centre, Aruna Asaf Ali Marg, New Delhi 110067, India

<sup>c</sup>Department of Physics and Astrophysics, University of Delhi, New Delhi 110007, India

<sup>d</sup>Amity Institute of Nanotechnology, Amity University, Sector 125, Noida 201313, India

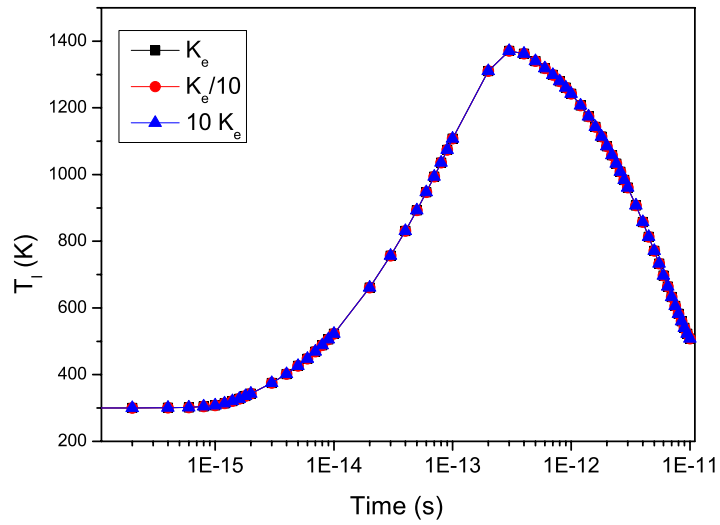

Fig. S1: The evolution of lattice temperature with time for 100 MeV Au ions in Ni right at the ion track. The three coincident curves are plotted for the following three sets of lattice temperature dependent lattice thermal conductivities:  $K_l(T_l)$  for Ni<sup>1</sup> (black),  $K_l(T_l)$  reduced by a factor of 10 (red), and multiplied by a factor of 10 (blue) from the Ni value at all lattice temperatures.

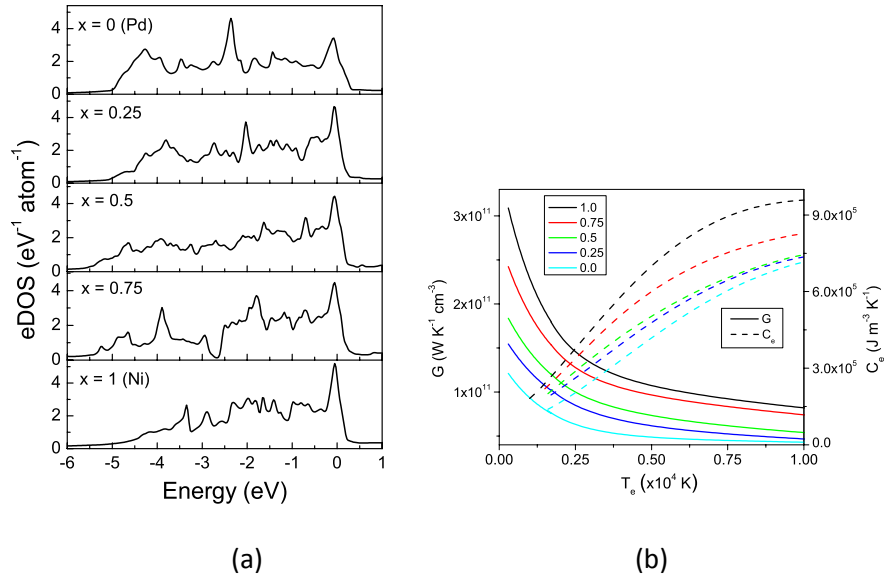

Fig. S2: (a) The electron densities of states of the  $\text{Pd}_{1-x}\text{Ni}_x$  ( $x = 0, 0.25, 0.5, 0.75, 1$ ) alloy system. (b) Variations of  $G$  and  $C_e$  with  $T_e$  for this alloy system.

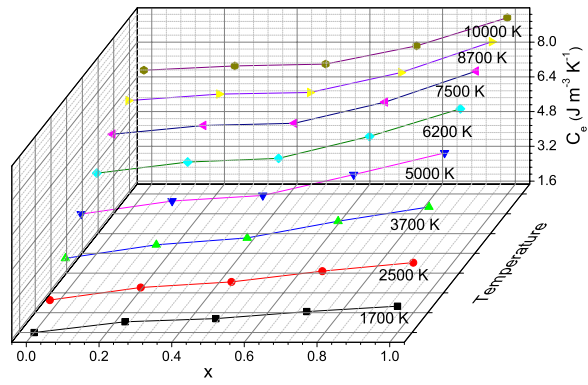

(a)

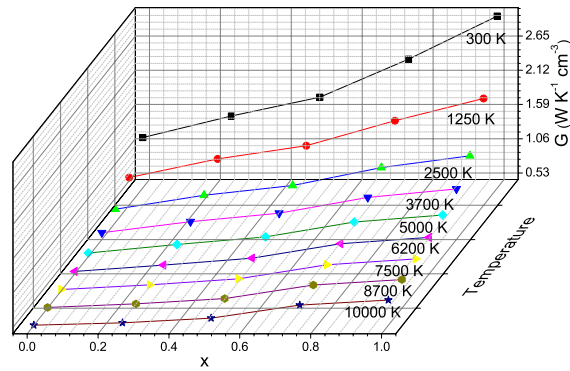

(b)

Fig. S3: Variation of G (a) and  $C_e$  (b) with  $x$  at different sampled electronic temperatures.

## References

- <sup>1</sup>Z. G. Wang, C. Dufour, E. Paumier and M. Toulemonde, J. Phys.: Condensed Matter, 1994, 6, 6733.
